# Supplementary material for: Botulinum neurotoxin type-A enters a non-recycling pool of synaptic vesicles
Source: PubMed Central journal article supplement (PMC4726273; doi:10.1038/srep19654), 2016-01-25

## **Botulinum neurotoxin type-A enters a non-recycling pool of synaptic vesicles**

Callista B Harper<sup>1,2</sup>, Andreas Papadopoulos<sup>1#</sup>, Sally Martin<sup>1,3#</sup>, Daniel R Matthews<sup>4</sup>, Garry P Morgan<sup>5</sup>, Tam H Nguyen<sup>1</sup>, Tong Wang<sup>1</sup>, Deepak Nair<sup>6,7</sup>, Daniel Choquet<sup>6</sup> and Frederic A Meunier<sup>1\*</sup>

<sup>1</sup>The University of Queensland, Queensland Brain Institute, Clem Jones Centre for Ageing Dementia Research, Brisbane, Queensland 4072, Australia.

<sup>2</sup>Current Address: Centre for Integrative Physiology, University of Edinburgh, Hugh Robson Building, George Square, Edinburgh, Scotland.

<sup>3</sup>Current Address: The University of Queensland, Australian Institute for Bioengineering and Nanotechnology (AIBN), Brisbane, Queensland 4072, Australia

<sup>4</sup>The University of Queensland, Queensland Brain Institute, Brisbane, Queensland 4072, Australia.

<sup>5</sup>The University of Queensland, Centre for Microscopy and Microanalysis, Brisbane, Queensland 4072, Australia.

<sup>6</sup>Interdisciplinary Institute for Neuroscience, The University of Bordeaux, Bordeaux, 33000, France.

<sup>7</sup>Centre for Neuroscience, Indian Institute of Science, Bangalore, 560012, India

\*Correspondence to: Frederic A. Meunier, email: f.meunier@uq.edu.au, Tel.: +61-7-3346-6373, Fax: +61-7-3346-6301, Queensland Brain Institute, The University of Queensland, Brisbane, Queensland 4072, Australia.

#both authors contributed equally

**Supplementary Figure S1: Normalized fluorescence intensity of pHrodo-BoNT/A-Hc in vitro at varying pHs.** The data were plotted as mean $\pm$ sem ( $n=4$ ) and fit to a Henderson-Hasselbach equation ( $r^2 = 0.99$ ), which gave a pKa value of 7.03 (95% confidence intervals = 0.401).

**Supplementary Figure S2: NH<sub>4</sub>Cl-evoked destaining of presynaptic nerve terminals labeled with pHrodo-BoNT/A-Hc or pHrodo-dextran reduces fluorescence to comparable levels.**

Hippocampal neurons (14-17 days *in vitro*) were loaded with either pHrodo-BoNT/A-Hc (300 nM) (A) or pHrodo-dextran (0.1 mg/ml) during a 2 min high K<sup>+</sup> stimulation. Neurons were left to recover for 12-15 min prior to the addition of NH<sub>4</sub>Cl (50 mM), which alkalizes the lumen of labeled SVs and thus quenches the pHrodo fluorescence. (A) Representative nerve terminals labeled with pHrodo-BoNT/A-Hc prior to destaining and 400 s following the addition of NH<sub>4</sub>Cl. Enlargements show the response of a representative nerve terminal to the destaining over time. Scale 5  $\mu$ m. (B) Normalized fluorescence of nerve terminals loaded with pHrodo-BoNT/A-Hc ( $n=6$ ) or pHrodo-dextran ( $n=5$ ) in response to NH<sub>4</sub>Cl. Data are plotted as mean $\pm$ sem. (C) The change in fluorescent intensity of pHrodo-BoNT/A-Hc was measured *in vitro* in response to pH change from either pH 4 to 8 or from pH 8 to 4 ( $n=3$  experiments).

**Supplementary Movie S1: BoNT/A-Hc-containing vesicles are distributed throughout hippocampal nerve terminals.** A three-dimensional reconstruction of a representative presynaptic region that has endocytosed HRP-BoNT/A-Hc (green vesicles and endosomes). Synaptic vesicles and endosomes that do not contain HRP-BoNT/A-Hc are shown in red. The presynaptic plasma membrane is displayed in yellow. Scale 200 nm.

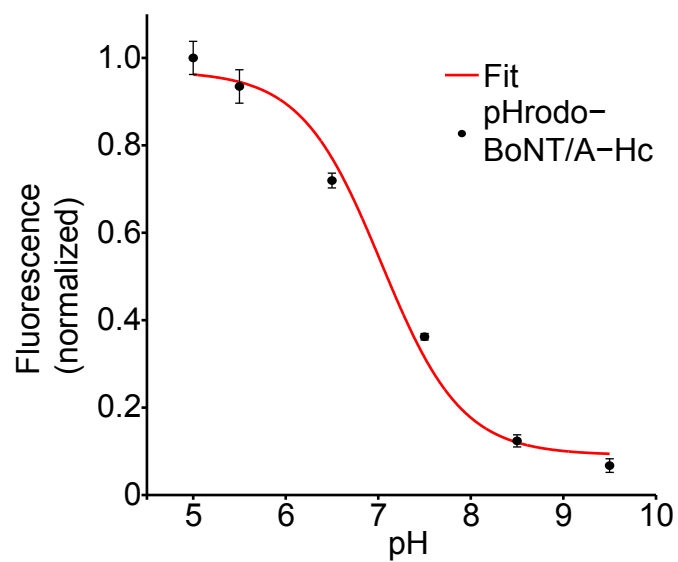

**A**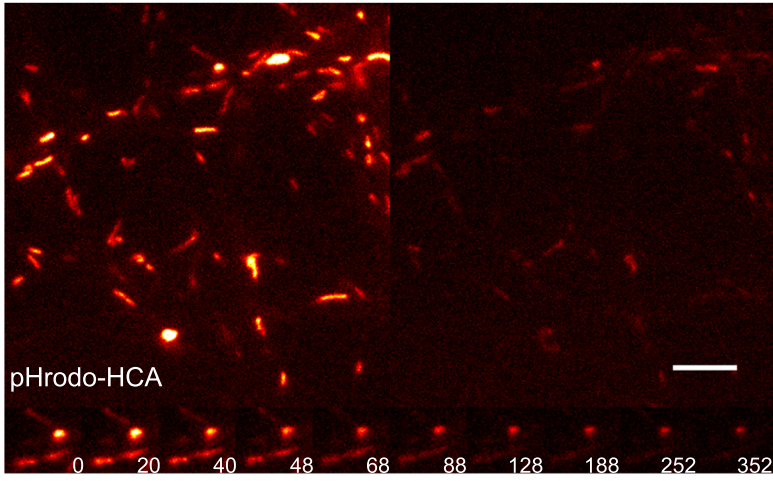**B**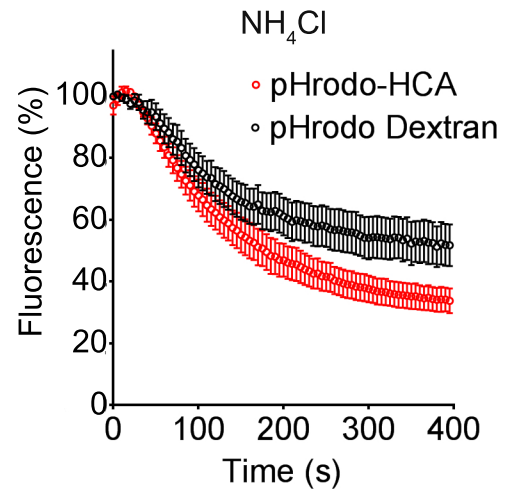**C**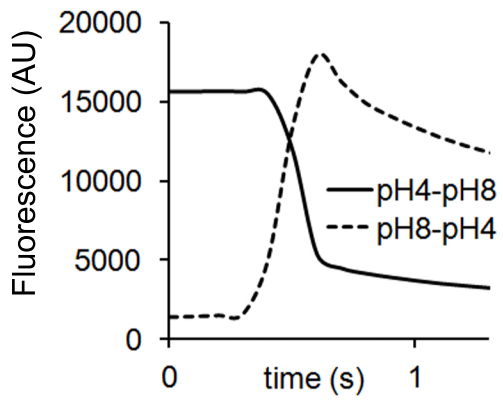

Supplement: srep19654-s1.pdf [file srep19654-s1.pdf]
